# Supplementary material for: Protection of the Ovine Fetal Gut against Ureaplasma-Induced Chorioamnionitis: A Potential Role for Plant Sterols
Source: PubMed Central journal article supplement (PMC6566982; doi:10.3390/nu11050968), 2019-04-27
Supplement: nutrients-11-00968-s001.pdf [file nutrients-11-00968-s001.pdf]

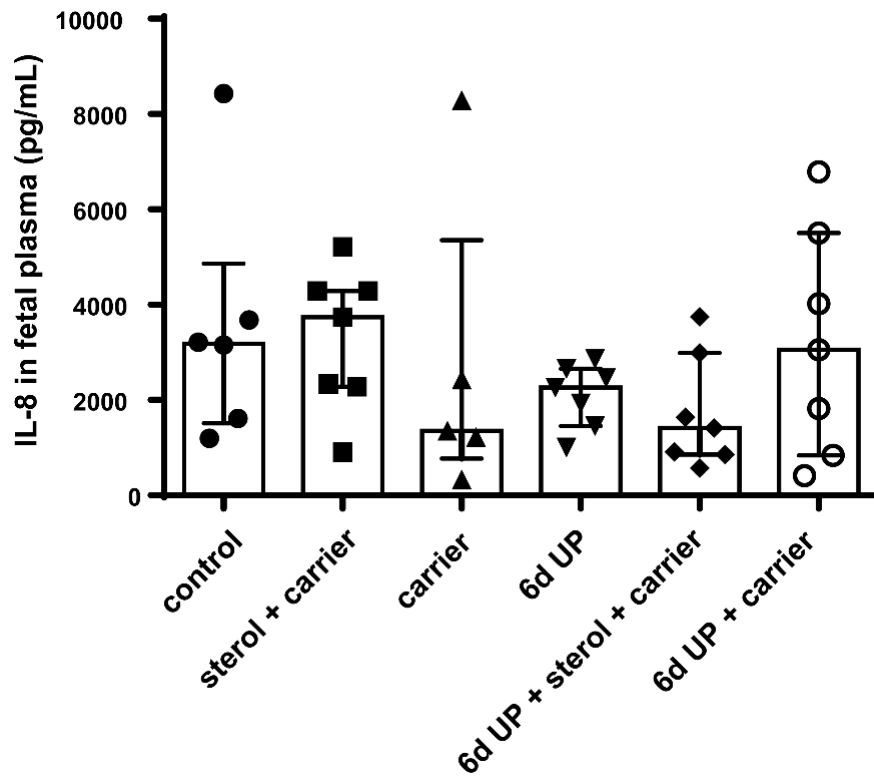

**Supplemental figure 1.** Circulatory IL-8 levels in fetuses of 133d GA. No significant changes were found between the treatment groups. UP: Ureaplasma

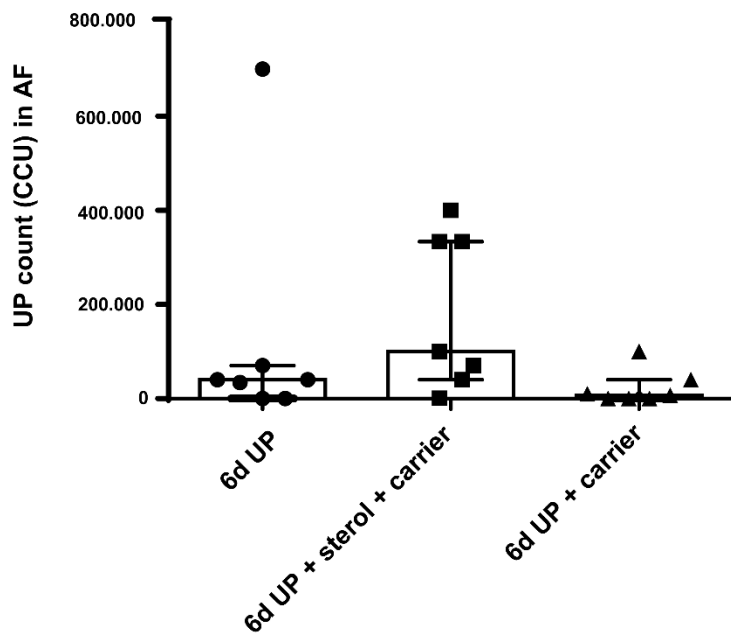

**Supplemental figure 2.** Ureaplasma parvum titers measured in AF samples taken at 133d GA. UP was only found in AF of animals injected with UP. No statistical differences were found between the different treatment groups. AF: amniotic fluid; CCU: color changing unit; GA: gestational age; UP: Ureaplasma.

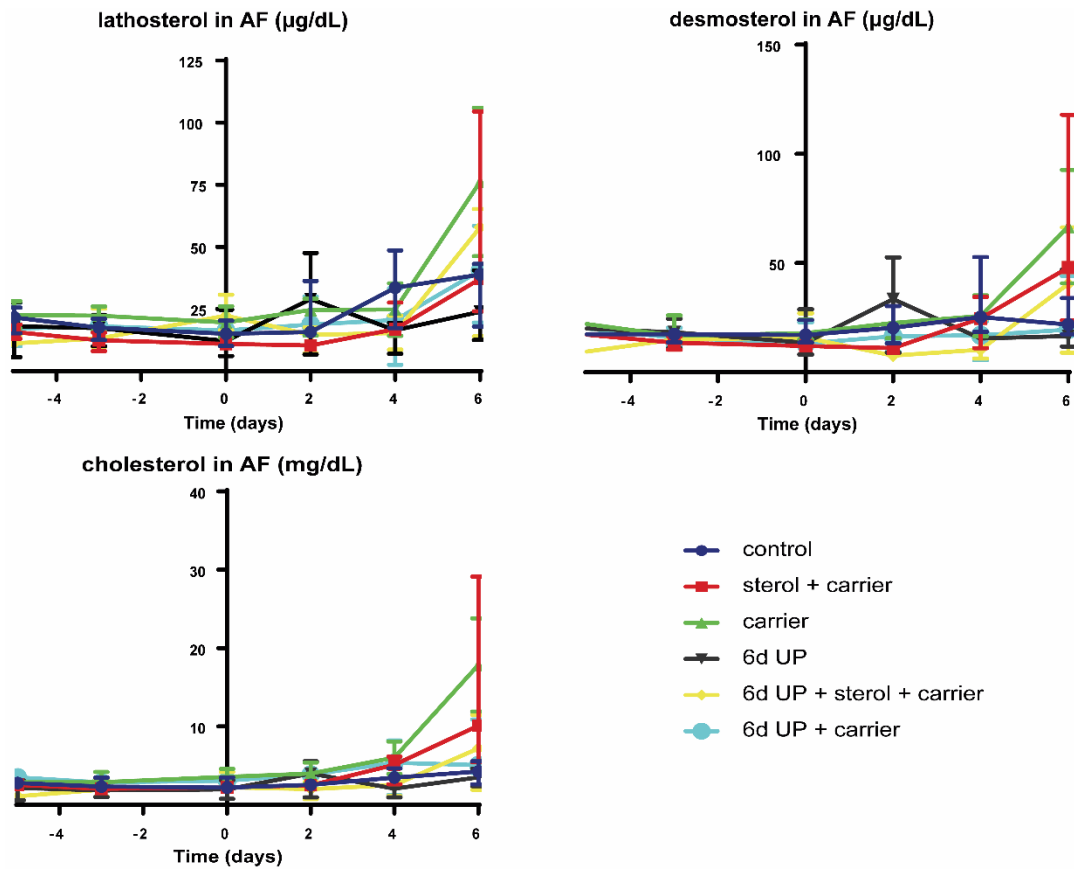

**Supplemental figure 3.** AF concentrations of cholesterol precursors (lathosterol, desmosterol) and cholesterol. At day 11, no significant differences were found for lathosterol (A), desmosterol (B) and cholesterol (C) in all treatment groups. Day 0 (122d GA) is the start of plant sterol treatment, day 5 (127d GA) is the day of intra-amniotic UP injection and day 11 (133d GA) is the moment of preterm delivery. AF: amniotic fluid; GA: gestational age; UP: Ureaplasma.

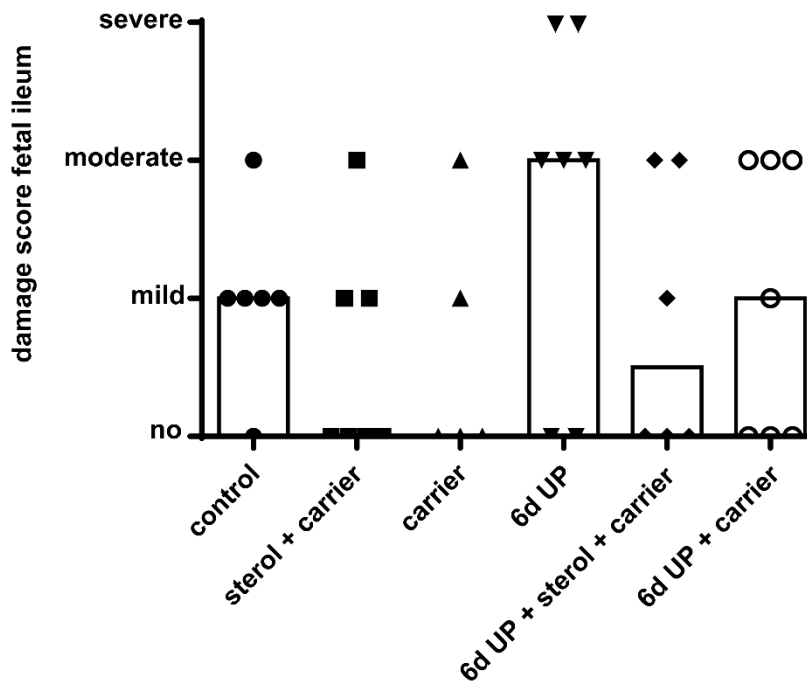

**Supplemental figure 4.** Evaluation of damage in the distal ileum of preterm lambs by H&E staining. Intestinal sections were judged as no damage (no damage visible), mild damage (apical epithelial integrity not complete, but no apparent loss of enterocytes), moderate damage (apical epithelial integrity not complete, loss of some enterocytes from the villus tips) or severe damage (apical epithelial integrity not complete, abundant loss of enterocytes from villus tips). The 6d UP group had more moderate to severe intestinal damage than the other experimental groups. H&E: hematoxylin and eosin; UP: Ureaplasma.

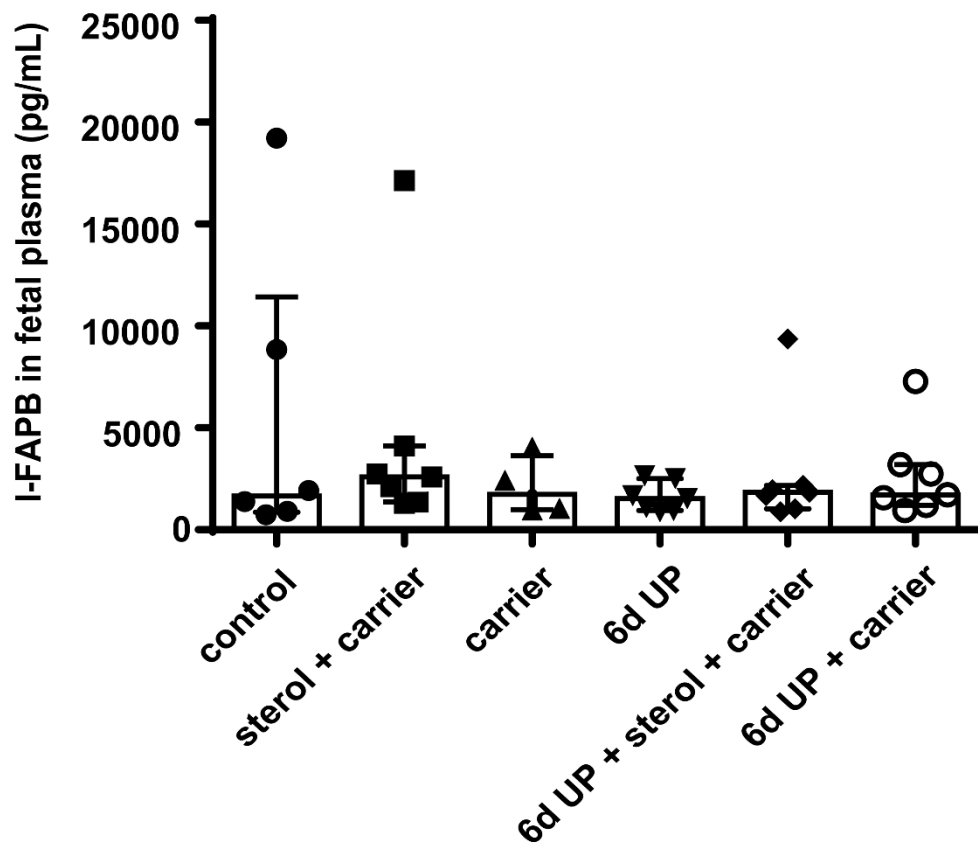

**Supplemental figure 5.** Circulatory I-FABP levels in fetuses of 133d GA. No significant changes were found between all treatment groups. I-FABP: intestinal fatty acid binding protein; UP: Ureaplasma.

**Supplemental table 1.** Identification of phosphocholines, sphingomyelins, phosphatidylinositol and bile acids.

| Mass-to-charge ratio<br><i>m/z</i> | Exact mass | $\Delta m$<br>(ppm) | Lipid assignment             | Adduct              | Fragment ions ( <i>m/z</i> )                                                                                                                                                                    |
|------------------------------------|------------|---------------------|------------------------------|---------------------|-------------------------------------------------------------------------------------------------------------------------------------------------------------------------------------------------|
| 725.5587                           | 725.5567   | 2.75                | SM (34:1)                    | [M+Na] <sup>+</sup> | 184.0 (phosphocholine head group), 542.5 (loss of phosphocholine ion, $\Delta m=183$ ), 666.5 (loss of trimethylamine, $\Delta m=59$ )                                                          |
| 760.5868                           | 760.5850   | 2.36                | PC (34:1)                    | [M+H] <sup>+</sup>  | 184.0 (phosphocholine head group), 577.5 (loss of phosphocholine ion, $\Delta m=183$ ), 701.5 (loss of trimethylamine, $\Delta m=59$ )                                                          |
| 782.5692                           | 782.5670   | 2.8                 | PC (34:1)                    | [M+Na] <sup>+</sup> | 184.0 (phosphocholine head group), 577.5 (loss of phosphocholine ion + Na <sup>+</sup> ), 599.5 (loss of phosphocholine ion, $\Delta m=183$ ), , 723.5 (loss of trimethylamine, $\Delta m=59$ ) |
| 810.6006                           | 810.5983   | 2.83                | PC (36:1)                    | [M+Na] <sup>+</sup> | 184.0 (phosphocholine head group), 605.5 (loss of phosphocholine ion + Na <sup>+</sup> ), 627.5 (loss of phosphocholine ion, $\Delta m=183$ ), 751.5 (loss of trimethylamine, $\Delta m=59$ )   |
| 885.5423                           | 885.5498   | 8.46                | PI (38:4)                    | [M-H] <sup>-</sup>  | 581.3 (loss of FA, $\Delta m=304$ ), 241,0 PI(241)                                                                                                                                              |
| 498.2901                           | 498.2895   | 1.2                 | Taurodeoxycholic acid (TDCA) | [M-H] <sup>-</sup>  | 79.96 [SO <sub>3</sub> ] <sup>-</sup> , 106.9 [C <sub>2</sub> H <sub>3</sub> O <sub>3</sub> S] <sup>-</sup> , 124 [C <sub>2</sub> H <sub>6</sub> NO <sub>3</sub> S] <sup>-</sup>                |

|          |          |     |                           |                    |                                                                                                                                                                                        |
|----------|----------|-----|---------------------------|--------------------|----------------------------------------------------------------------------------------------------------------------------------------------------------------------------------------|
| 514.2848 | 514.2844 | 0.7 | Taurocholic acid<br>(TCA) | [M-H] <sup>-</sup> | 79.96 [SO <sub>3</sub> ] <sup>-</sup> , 106.9<br>[C <sub>2</sub> H <sub>3</sub> O <sub>3</sub> S] <sup>-</sup> , 124<br>[C <sub>2</sub> H <sub>6</sub> NO <sub>3</sub> S] <sup>-</sup> |
|----------|----------|-----|---------------------------|--------------------|----------------------------------------------------------------------------------------------------------------------------------------------------------------------------------------|

**Supplemental table 2.** Identification of the carrier (2-hydroxypropyl-β-cyclodextrin).

|                 | Mass-to-charge ratio<br><i>m/z</i><br><b>on tissue</b> | Mass-to-charge ratio<br><i>m/z</i><br><b>standard</b> | Δ <i>m</i> (ppm) |
|-----------------|--------------------------------------------------------|-------------------------------------------------------|------------------|
| Parent ion      | 1331.4856                                              | 1331.4854                                             | 0.15             |
| MS/MS fragments | 1169.4324                                              | 1169.4323                                             | 0.09             |
|                 | 1007.3794                                              | 1007.3794                                             | 0                |
|                 | 949.3375                                               | 949.3374                                              | 0.10             |
|                 | 845.3264                                               | 845.3266                                              | 0.23             |
|                 | 787.2846                                               | 787.2849                                              | 0.38             |
|                 | 729.2427                                               | 729.2428                                              | 0.14             |
|                 | 683.2736                                               | 683.2738                                              | 0.29             |
|                 | 625.2317                                               | 625.2318                                              | 0.16             |
|                 | 567.1898                                               | 567.1903                                              | 0.88             |
|                 | 463.1787                                               | 463.1787                                              | 0                |
|                 | 405.1369                                               | 405.1371                                              | 0.49             |
|                 | 304.2464                                               | 304.2434                                              | 9.86             |
